# Supplementary material for: Educational differentials in the realisation of fertility intentions: Is sub-Saharan Africa different?
Source: PLoS One. 2019 Jul 18;14(7):e0219736. doi: 10.1371/journal.pone.0219736 (PMC6638943; doi:10.1371/journal.pone.0219736)
Supplement: S1 Table — (XLSX) [file pone.0219736.s001.xlsx]

## Sheet: Sheet1
List of Demographic and Health Surveys used
Note: Surveys in bold used for individual level analysis
Western/Middle Africa
Benin	1996	2001	2006	2012
Burkina Faso	1993	1999	2003	2010
Cameroon	1991	1998	2004	2011
Chad	1997	2004	2014
Congo	2005	2011
Congo, Democratic Republic	2007	2013
Cote d'Ivoire	1994	1998	2012
Ghana	1988	1993	1998	2003	2008	2014
Guinea	1999	2005	2012
Liberia	1986	2007	2013
Mali	1987	1996	2001	2006	2012
Niger	1992	1998	2006	2012
Nigeria	1990	1999	2003	2008	2013
Sao Tome and Principe	2008
Senegal	1986	1993	1997	2005	2010	2012	2014
Sierra Leone	2008	2013
Togo	1988	1998	2013
Eastern/Southern Africa
Burundi	1987	2010
Comoros	1996	2012
Eritrea	1995	2002
Ethiopia	2000	2005	2011
Gabon	2000	2012
Kenya	1989	1993	1998	2003	2008	2014
Lesotho	2004	2009	2014
Madagascar	1992	1997	2004	2008
Malawi	1992	2000	2004	2010
Mozambique	1997	2003	2011
Namibia	1992	2000	2006	2013
Rwanda	1992	2000	2005	2008	2010	2015
Swaziland	2006
Tanzania	1992	1996	1999	2004	2010
Uganda	1988	1995	2000	2006	2011
Zambia	1992	1996	2002	2007	2013
Zimbabwe	1988	1994	1999	2005	2010
Latin America and the Caribbean
Bolivia	1989	1994	1998	2003	2008
Brazil	1986	1996
Colombia	1986	1990	1995	2000	2005	2010
Dominican Republic	1986	1991	1996	1999	2002	2007	2013
Guatemala	1987	1995	1999
Haiti	1994	2000	2006	2012
Honduras	2005	2011
Nicaragua	1998	2001
Peru	1986	1992	1996	2000	2004	2007	2009	2010	2011	2012
Asia and Northern Africa
Armenia	2000	2005	2010
Bangladesh	1994	1997	2000	2004	2007	2011	2014
Cambodia	2000	2005	2010	2014
Egypt	1988	1992	1995	2000	2003	2005	2008	2014
India	1993	1999	2006
Indonesia	1987	1991	1994	1997	2003	2007	2012
Jordan	1990	1997	2002	2007	2009	2012
Kazakhstan	1995	1999
Kyrgyz Republic	1997	2012
Morocco	1987	1992	2003
Nepal	1996	2001	2006	2011
Pakistan	1991	2006	2012
Philippines	1993	1998	2003	2008	2013
Turkey	1993	1998	2003
Vietnam	1997	2002
Yemen	1991	1997	2013
